# Supplementary material for: Implementation of Parenting Programs in Real-World Community Settings: A Scoping Review
Source: Springer Nature journal article supplement (doi:10.1007/s10567-023-00465-0), 2023-12-07
Supplement: MOESM1 [file 26506096]

## Implementation of parenting programs in real-world community settings: A scoping review

*Clinical Child and Family Psychology Review*

Rita Pinto<sup>1</sup>, Catarina Canário, Patty Leijten, Maria José Rodrigo, & Orlanda Cruz

<sup>1</sup> Center for Psychology at University of Porto, Faculty of Psychology and Education Sciences, University of Porto, Portugal

<sup>1</sup>Corresponding Author Email: up201006360@edu.fpce.up.pt

### Table 1.

*Study, Program, and Context Characteristics: Country Where the Study was Conducted (if not Reported, Country of the Lead Author's Research Institute); Name of the Program Delivered and its Type of Delivery/Format; the Setting in Which the Program was Implemented.*

| Authors (year)        | Country                        | Programs                                                  | Delivery/Format                               | Settings                                                                                      |
|-----------------------|--------------------------------|-----------------------------------------------------------|-----------------------------------------------|-----------------------------------------------------------------------------------------------|
| Aalborg et al. (2010) | United States of America (USA) | Strengthening Families Program 10–14*<br>Family Matters** | Face-to-face/Group*<br>Telephone/Individual** | Health care settings/medical centres                                                          |
| Aarons et al. (2012)  | USA                            | The Incredible Years (Basic IY)                           | Face-to-face/Group                            | Community-based organization providing residential substance abuse and mental health services |
| Abdala et al. (2020)  | Brazil                         | Strengthening Families Program 10–14                      | Face-to-face/Group                            | Community-based setting                                                                       |
| Akin et al. (2016a)   | USA                            | Strengthening Families Program                            | Face-to-face/Group                            | Child welfare agencies                                                                        |

| Authors (year)                | Country   | Programs                                                                             | Delivery/Format                   | Settings                |
|-------------------------------|-----------|--------------------------------------------------------------------------------------|-----------------------------------|-------------------------|
|                               |           | Celebrating Families!                                                                |                                   |                         |
| Akin et al. (2016b)           | USA       | Strengthening Families Program<br>Celebrating Families!                              | Face-to-face/Group                | Child welfare agencies  |
| Allechin et al. (2022)        | Australia | Let's Talk about Children                                                            | No info                           | Mental health agencies  |
| Álvarez et al. (2016)         | Spain     | Growing Up Happily in the Family                                                     | Face-to-face/Group and individual | Local social services   |
| Amador Buenabad et al. (2020) | Mexico    | Leaving Traces on Your Life (Huellitas)<br>Parent Management Training - Oregon Model | Face-to-face/Group                | School                  |
| Amarós-Martí et al. (2016)    | Spain     | Learning Together, Growing with Family                                               | Face-to-face/Group                | Non-profit organization |
| Arim et al. (2017)            | Canada    | Triple P                                                                             | No info                           | Community-based setting |
| Arruabarrena et al. (2019)    | Spain     | SafeCare                                                                             | Face-to-face/Individual           | Child welfare agencies  |
| Asgary-Eden & Lee (2011)      | USA       | Triple P                                                                             | Face-to-face/Individual and Group | Community-based setting |
| Ballard (2017)                | USA       | Parent Management Training - Oregon Model                                            | Face-to-face/Group                | School                  |
| Bamberger (2016)              | USA       | Strengthening Families Program 10-14                                                 | Face-to-face/Group                | Community-based setting |
| Barnett et al. (2014)         | USA       | Child-Parent Psychotherapy                                                           | No info                           | Mental health agencies  |
| Barnett et al. (2021)         | USA       | Parent-Child Interaction Therapy                                                     | No info                           | Mental health agencies  |
| Bartley (2017)                | USA       | Family Connections                                                                   | No info                           | Community-based setting |
| Berkel et al. (2013)          | USA       | Strong African American Families                                                     | Face-to-face/Group                | Community-based setting |
| Berkel et al. (2018)          | USA       | New Beginnings Program                                                               | Face-to-face/Group                | Community-based setting |
| Bloomquist et al. (2016)      | USA       | Early Risers<br>Healthy Emotions Program                                             | Face-to-face/Individual and Group | Mental health agencies  |
| Brabson (2017)                | USA       | Parent-Child Interaction Therapy                                                     | No info                           | Community-based setting |

| Authors (year)             | Country        | Programs                                                      | Delivery/Format                              | Settings                                                                                                                            |
|----------------------------|----------------|---------------------------------------------------------------|----------------------------------------------|-------------------------------------------------------------------------------------------------------------------------------------|
| Brabson et al. (2021)      | USA            | Parent-Child Interaction Therapy                              | No info                                      | Clinics                                                                                                                             |
| Breitenstein et al. (2010) | USA            | Chicago Parent Program                                        | Face-to-face/Group                           | Childcare centers                                                                                                                   |
| Breitkreuz et al. (2011)   | Canada         | Triple P (levels 2 and 3)                                     | No info                                      | Family support centers                                                                                                              |
| Butler (2019)              | United Kingdom | Triple P Self-directed                                        | Online, Self-directed/Individual             | Community-based setting                                                                                                             |
| Cantu et al. (2010)        | USA            | Strengthening Families Program 10–14                          | Face-to-face/Group                           | Faith-based organizations, social service agencies, the juvenile justice system and community substance-abuse prevention coalitions |
| Chaffin et al. (2016)      | USA            | SafeCare                                                      | Face-to-face/Individual                      | Child welfare agencies                                                                                                              |
| Charest & Gagné (2019a)    | Canada         | Triple P                                                      | Face-to-face/No info                         | Child welfare services, primary social care services, community organizations, schools, and child daycare centers                   |
| Charest & Gagné (2019b)    | Canada         | Triple P (levels 2 to 5)                                      | Face-to-face/Individual and Group            | Health care agency, non-profit organization, school, and child daycare center                                                       |
| Chase et al. (2019)        | USA            | Parent-Child Interaction Therapy                              | No info                                      | Mental health agencies                                                                                                              |
| Chlebowski et al. (2018)   | USA            | AIM HI (An Individualized Mental Health Intervention for ASD) | No info                                      | Mental health agencies                                                                                                              |
| Christian et al. (2014)    | USA            | Parent-Child Interaction Therapy                              | No info                                      | Mental health agencies                                                                                                              |
| Clarke (2013)              | United Kingdom | Triple P (levels 2 and 4)                                     | Online and Face-to-face/Individual and Group | Health services                                                                                                                     |
| Clay (2018)                | USA            | Triple P                                                      | Face-to-face/No info                         | Local community agencies                                                                                                            |

| Authors (year)                | Country      | Programs                                                                             | Delivery/Format                         | Settings                                                                                                                     |
|-------------------------------|--------------|--------------------------------------------------------------------------------------|-----------------------------------------|------------------------------------------------------------------------------------------------------------------------------|
| Cluver et al. (2016)          | South Africa | Sinovuyo Teen Caring Families (part of the Parenting for Lifelong Health initiative) | Face-to-face/Group                      | Child welfare agencies, church                                                                                               |
| Cooper et al. (2016)          | USA          | Strengthening Families Program 10–14                                                 | Face-to-face/Group                      | School buildings, religious, government, or some other public facility                                                       |
| Côté & Gagné (2020a)          | Canada       | Triple P                                                                             | Face-to-face/No info                    | Childcare services, school, non-government organization, government primary care agency, and child welfare services          |
| Côté & Gagné (2020b)          | Canada       | The Triple P (level 2)                                                               | Face-to-face/No info                    | School, childcare services, Non-governmental organizations<br>Governmental primary care agencies, and child welfare services |
| Dababnah & Parish (2014)      | USA          | The Incredible Years (IY Basic)                                                      | Face-to-face/Group                      | Community-based setting                                                                                                      |
| Dawson-Squibb et al. (2022)   | South Africa | Parent–Child Interaction Therapy                                                     | No info                                 | Mental health agencies                                                                                                       |
| De Paul et al. (2015)         | Spain        | SafeCare*<br>Incredible Years**                                                      | Face-to-face/Individual*<br>and Group** | Child welfare agencies                                                                                                       |
| Delawarde-Saïas et al. (2018) | Canada       | Triple P (levels 2 to 5)                                                             | No info/Individual and Group            | Child welfare agencies, school, childcare centers, non-profit organization                                                   |
| Denard (2017)                 | USA          | Triple P                                                                             | Face-to-face/No info                    | Child welfare agencies                                                                                                       |
| Estrada et al. (2017)         | USA          | Familias Unidas                                                                      | Face-to-face/Group                      | School                                                                                                                       |
| Estrada et al. (2018)         | USA          | eHealth Familias Unidas                                                              | Online/Individual                       | Parents' home or a community-based setting                                                                                   |

| Authors (year)              | Country   | Programs                                                                                 | Delivery/Format                   | Settings                                                  |
|-----------------------------|-----------|------------------------------------------------------------------------------------------|-----------------------------------|-----------------------------------------------------------|
| Fang et al. (2022)          | China     | SREIA                                                                                    | Face-to-face/Individual and Group | Not-for-profit organization                               |
| Fawley-King et al. (2014)   | Australia | Triple P                                                                                 | Face-to-face/Group                | Churches, community centres, and other public spaces      |
| Fowles et al. (2018)        | USA       | Parent-Child Interaction Therapy                                                         | No info                           | Parents' home, clinic                                     |
| Frantz et al. (2015)        | Germany   | The Prevention Program for Externalizing Problem Behavior*<br>Triple P (levels 1 to 4)** | Face-to-face*/Group*<br>No info** | Schools, family services, youth-welfare services, clinics |
| Gagnon (2016)               | USA       | Guiding Good Choices                                                                     | Face-to-face/Group                | Schools                                                   |
| Gallitto et al. (2018)      | Canada    | SafeCare                                                                                 | Face-to-face/Individual           | Child welfare agencies                                    |
| Garcia et al. (2020)        | USA       | Triple P (levels 3 and 4)                                                                | Face-to-face/Individual and Group | Child welfare agencies                                    |
| Glazemakers (2012)          | Belgium   | Triple P (all levels)                                                                    | No info/Individual and Group      | Child welfare agencies, schools                           |
| Gomi (2015)                 | USA       | Parent Management Training - Oregon Model                                                | Face-to-face/Individual           | Child welfare agencies                                    |
| Gordon & Cooper (2015)      | USA       | Parent-Child Interaction Therapy                                                         | Face-to-face/Individual           | Clinic                                                    |
| Guastaferrero et al. (2017) | USA       | SafeCare<br>Parents as Teachers                                                          | Face-to-face/No info              | Community-based setting                                   |
| Haroz et al. (2019)         | USA       | Family Spirit                                                                            | Face-to-face/Individual           | Community-based setting                                   |
| Heerman et al. (2018)       | USA       | Healthier Families Program                                                               | Face-to-face/Individual           | Parks and recreation centers                              |
| Herschell et al. (2021)     | USA       | Parent-Child Interaction Therapy                                                         | Face-to-face/Individual           | Mental health agencies                                    |
| Hickey et al. (2018)        | Ireland   | Incredible Years                                                                         | No info                           | Community-based setting                                   |
| Hill et al. (2007)          | USA       | Strengthening Families Program 10-14                                                     | No info                           | Community-based setting                                   |

| Authors (year)              | Country      | Programs                                                                             | Delivery/Format                   | Settings                                                                                  |
|-----------------------------|--------------|--------------------------------------------------------------------------------------|-----------------------------------|-------------------------------------------------------------------------------------------|
| Hill et al. (2019)          | USA          | Strengthening Families Program 10-14                                                 | No info                           | Community-based setting                                                                   |
| Hodge et al. (2017)         | Australia    | Triple P (Indigenous)                                                                | Face-to-face/Individual and Group | Child welfare agencies                                                                    |
| Huebner et al. (2021)       | USA          | Sobriety Treatment and Recovery Teams                                                | No info                           | Child welfare agencies                                                                    |
| Ionutiu (2016)              | Romania      | Triple P (level 4)                                                                   | Face-to-face/Group                | Counseling and support center for parents and children                                    |
| Jackson et al. (2017)       | USA          | Parent-Child Interaction Therapy                                                     | No info                           | Community-based setting                                                                   |
| Kerns et al. (2017)         | USA          | Triple P (levels 3 and 4)                                                            | No info                           | Community-based setting                                                                   |
| Klest (2014)                | Norway       | Parent Management Training - Oregon Model                                            | No info                           | Child welfare agencies                                                                    |
| Kumpfer et al. (2012)       | Ireland      | Strengthening Families Program 12–16                                                 | Face-to-face/Group                | Interagency collaboration of national and county delinquency and substance abuse agencies |
| Kutash et al. (2012)        | USA          | Parent Connectors                                                                    | Telephone calls/Individual        | Community-based setting                                                                   |
| Lachman et al. (2016)       | South Africa | Sinovuyo Teen Caring Families (part of the Parenting for Lifelong Health initiative) | Face-to-face/Group                | Non-profit organization                                                                   |
| Lanier et al. (2011)        | USA          | Parent–Child Interaction Therapy                                                     | No info                           | Community-based setting                                                                   |
| Lau et al. (2011)           | USA          | Incredible Years                                                                     | Face-to-face/Group                | Clinic, school                                                                            |
| Leclair et al. (2017)       | Canada       | Incredible Years                                                                     | Face-to-face/Group                | Child welfare agencies                                                                    |
| Lee et al. (2006)           | USA          | Early Risers                                                                         | Face-to-face/Group                | Community-based setting                                                                   |
| Lengnick-Hall et al. (2019) | USA          | SafeCare                                                                             | Face-to-face/Individual           | Child welfare agencies                                                                    |
| Lent (2022)                 | USA          | Parent-Child Interaction Therapy                                                     | Online/Individual and Group       | Community-based setting                                                                   |
| Lewis et al. (2016)         | USA          | Triple P (level 5)                                                                   | Face-to-face/Individual           | Child welfare agencies                                                                    |

| Authors (year)          | Country        | Programs                                                                                    | Delivery/Format                            | Settings                                                                                                   |
|-------------------------|----------------|---------------------------------------------------------------------------------------------|--------------------------------------------|------------------------------------------------------------------------------------------------------------|
| Liebsack (2019)         | USA            | Parent-Child Interaction Therapy                                                            | No info                                    | Mental health agencies                                                                                     |
| Lindsay et al. (2011)   | United Kingdom | Incredible years<br>Triple P (level 4)<br>Strengthening Families, Strengthening Communities | Face-to-face/Group                         | Community centres, schools, clinics, and the premises of voluntary bodies                                  |
| Love et al. (2016)      | USA            | Triple P Online Community                                                                   | Online/Individual (self-directed)          | Community-based setting                                                                                    |
| Lyon & Budd (2010)      | USA            | Parent Child Interaction Therapy                                                            | Face-to-face/No info                       | Mental health agencies                                                                                     |
| Lyons et al. (2022)     | USA            | Parent–Child Interaction Therapy                                                            | No info                                    | Child welfare agencies                                                                                     |
| Margolis (2013)         | Spain          | Family Check-Up                                                                             | No info                                    | Schools                                                                                                    |
| Mathias et al. (2022)   | India          | Parenting for Lifelong Health                                                               | Face-to-face/Group                         | Community-based setting                                                                                    |
| Matos et al. (2006)     | USA            | Parent–Child Interaction Therapy                                                            | Face-to-face/Individual                    | Community-based setting                                                                                    |
| Matsumoto et al. (2007) | Australia      | Triple P                                                                                    | Telephone/Group and Telephone consultation | Community-based setting                                                                                    |
| Mauricio et al. (2019)  | USA            | Family Check-Up                                                                             | Face-to-face/No info                       | Mental health agencies                                                                                     |
| McCoy et al. (2021)     | Thailand       | Parenting for Lifelong Health                                                               | Face-to-face/Group                         | Public health services                                                                                     |
| McDonald et al. (2012)  | USA            | Families and Schools Together                                                               | Face-to-face/Group                         | Refugee centre                                                                                             |
| McWilliams (2020)       | USA            | Incredible Years (IY Basic)                                                                 | Face-to-face/Group                         | Community-based setting                                                                                    |
| Miller & Keating (2013) | Canada         | Incredible Years                                                                            | Face-to-face/Group                         | Community-based setting                                                                                    |
| Miller et al. (2010)    | USA            | Parents Matter!                                                                             | No info                                    | Community-based organizations, faith-based organizations, health departments, and local education agencies |

| Authors (year)                  | Country   | Programs                                                           | Delivery/Format                                            | Settings                                                      |
|---------------------------------|-----------|--------------------------------------------------------------------|------------------------------------------------------------|---------------------------------------------------------------|
| Murry et al. (2018)             | USA       | Pathways for African American Success                              | Face-to-face and Technology-based/<br>Individual and Group | Community-based setting                                       |
| Myers et al. (2020)             | USA       | Triple P                                                           | Face-to-face/No info                                       | Child welfare agencies                                        |
| Nelson et al. (2012)            | USA       | Parent-Child Interaction Therapy                                   | No info                                                    | Mental health agencies                                        |
| Nolan (2014)                    | USA       | Triple P                                                           | No info                                                    | Community-based setting                                       |
| Norton et al. (2021)            | Australia | Confident Body, Confident Child                                    | No info                                                    | Hospital                                                      |
| O'Connor et al. (2020)          | USA       | Healthy Dads Healthy Kids                                          | Face-to-face/Group                                         | Clinics                                                       |
| O'Donovan (2020)                | Ireland   | Strengthening Families Program                                     | Face-to-face/Group                                         | Community-based setting                                       |
| Ofoha et al. (2018)             | Nigeria   | Parenting Education Program for Punishment Prevention              | Face-to-face/Group                                         | Community-based setting                                       |
| Ogden et al. (2005)             | Norway    | Parent Management Training - Oregon Model                          | No info                                                    | Community-based setting                                       |
| Ogden et al. (2009)             | Norway    | Parent Management Training - Oregon Model<br>Multisystemic Therapy | No info                                                    | Child welfare, child mental health, and school-based agencies |
| Oppenheim-Weller & Zeira (2018) | Israel    | SafeCare                                                           | Face-to-face/Individual                                    | Child welfare agencies                                        |
| Orte Socias et al. (2016)       | Spain     | Strengthening Families Program                                     | Face-to-face/Group                                         | Child welfare agencies                                        |
| Osburn (2013)                   | USA       | Incredible Years                                                   | Online (self-directed)/Individual                          | Community-based setting                                       |
| Owens (2019)                    | USA       | Triple P (levels 2 to 5)                                           | No info                                                    | Community-based setting                                       |
| Parker et al. (2020)            | USA       | Families Talking Together                                          | Face-to-face/No info                                       | Community-based setting                                       |
| Parra Cardona et al. (2012)     | USA       | Parent Management Training - Oregon Model                          | Face-to-face/Group                                         | Religious organization                                        |
| Patras & Klest (2016)           | Norway    | Parent Management Training - Oregon Model                          | No info                                                    | Child welfare agencies                                        |



| Authors (year)             | Country  | Programs                                                                                                                | Delivery/Format                                                | Settings                                         |
|----------------------------|----------|-------------------------------------------------------------------------------------------------------------------------|----------------------------------------------------------------|--------------------------------------------------|
| Patrick et al. (2008)      | USA      | Staying Connected with Your Teen (formely known as Parents Who Care)                                                    | Face-to-face/Group                                             | Church                                           |
| Pickard et al. (2016)      | USA      | ImPACT Online                                                                                                           | Online (self-directed or with therapist assistance)/Individual | Community-based setting                          |
| Polaha et al. (2018)       | USA      | Family Check-Up                                                                                                         | No info                                                        | Pediatric residency, training clinic             |
| Porta et al. (2018)        | USA      | Early Risers                                                                                                            | No info                                                        | Community-based setting                          |
| Poulsen et al. (2010)      | Kenya    | Parents Matter!                                                                                                         | No info                                                        | Community-based setting                          |
| Puffer et al. (2017)       | Thailand | Strengthening Families Program (adaptation: Happy Families)                                                             | Face-to-face/Group                                             | International rescue committee                   |
| Quetsch (2019)             | USA      | Parent-Child Interaction Therapy                                                                                        | Face-to-face/No info                                           | Mental health agencies                           |
| Ramos (2019)               | USA      | Parent-Based Coping Scaffolding Program                                                                                 | No info                                                        | Community-based setting                          |
| Romney et al. (2014)       | USA      | Triple P (levels 4 and 5)                                                                                               | Face-to-face/Group                                             | Child welfare agencies<br>Mental health agencies |
| Roosa Ordway et al. (2018) | USA      | Mothering from the Inside Out                                                                                           | Face-to-face/Individual                                        | Mental health agencies                           |
| Rudo-Stern (2019)          | USA      | Family Check-Up                                                                                                         | No info                                                        | Community-based setting                          |
| Saldana et al. (2021)      | USA      | Families Actively Improving Relationships                                                                               | Face-to-face/No info                                           | Child welfare agencies                           |
| Scudder & Herschell (2015) | USA      | Parent–Child Interaction Therapy                                                                                        | No info                                                        | Community-based setting                          |
| Scudder et al. (2017)      | USA      | Parent-Child Interaction Therapy                                                                                        | No info                                                        | Community-based setting                          |
| Self-Brown et al. (2011)   | USA      | SafeCare                                                                                                                | Face-to-face/Individual                                        | Child welfare agencies                           |
| Shapiro & Charest (2020)   | USA      | Multisystemic Therapy<br>Parent Child Interaction Therapy<br>Alternatives for families: A cognitive behavioural therapy | No info/Individual and Group                                   | Non-profit organization, state agency, school    |

| Authors (year)                        | Country        | Programs                                                                | Delivery/Format                   | Settings                                                                              |
|---------------------------------------|----------------|-------------------------------------------------------------------------|-----------------------------------|---------------------------------------------------------------------------------------|
|                                       |                | Triple P<br>Functional Family Therapy<br>Strengthening Families Program |                                   |                                                                                       |
| Shapiro et al. (2015)                 | USA            | Triple P (levels 2 to 4)                                                | Face-to-face/Individual and Group | School, non-profit organization, mental health agency, childcare, and social services |
| Sigmarsdóttir & Guðmundsdóttir (2013) | Iceland        | Parent Management Training - Oregon Model                               | No info                           | Community-based setting                                                               |
| Sim et al. (2020)                     | Lebanon        | Families Make the Difference                                            | Face-to-face/Group                | International rescue committee                                                        |
| Skale et al. (2020)                   | USA            | Parent-Child Interaction Therapy<br>Child-Parent Psychotherapy          | No info                           | Mental health agencies                                                                |
| Smith et al. (2015)                   | USA            | Family Check-Up                                                         | No info                           | Mental health agencies                                                                |
| Stern et al. (2008)                   | Canada         | Incredible Years                                                        | Face-to-face/Group                | Early learning centers                                                                |
| Stokes (2014)                         | USA            | Parent-Child Interaction Therapy                                        | No info                           | Community-based setting                                                               |
| Suchman et al. (2020)                 | South Africa   | Mothering from the Inside Out                                           | Face-to-face/Group                | Hospitals                                                                             |
| Taylor et al. (2015)                  | Canada         | Triple P (level 4)                                                      | Face-to-face/Individual and Group | Community-based setting                                                               |
| Thomson et al. (2014)                 | United Kingdom | Empowering Parents, Empowering Communities                              | Face-to-face/Group                | Community-based setting                                                               |
| Turner & Sanders (2006)               | Australia      | Triple P (level 3)                                                      | Face-to-face/Individual           | Community child health clinics                                                        |
| Weaver et al. (2011)                  | USA            | Safe N' Sound                                                           | No info                           | Clinic                                                                                |
| Webster-Stratton et al. (2014)        | USA            | Incredible Years                                                        | Face-to-face/Group                | Mental health agencies                                                                |

| Authors (year)          | Country   | Programs                                                                                           | Delivery/Format         | Settings                                                             |
|-------------------------|-----------|----------------------------------------------------------------------------------------------------|-------------------------|----------------------------------------------------------------------|
| West et al. (2022)      | USA       | Attachment and Biobehavioral Catch-up                                                              | Face-to-face/Individual | Non-profit organization                                              |
| Whitaker et al. (2012)  | USA       | SafeCare                                                                                           | No info                 | Child welfare agencies                                               |
| Whitaker et al. (2015)  | USA       | SafeCare                                                                                           | No info                 | Child welfare agencies                                               |
| Woodfield et al. (2021) | Australia | Parent-Child Interaction Therapy                                                                   | No info                 | Child welfare agencies, clinic, not-for-profit organization, schools |
| Yingling et al. (2020)  | USA       | Autism Parent Navigators                                                                           | Face-to-face/Individual | Statewide parent support center                                      |
| Zerón (2017)            | USA       | Parent Management Training - Oregon Model (adaptation: Parenting Through Change for Reunification) | Face-to-face/Group      | Community-based setting                                              |

*Note.* When the same study reported the implementation of more than one program, and the type of program's delivery/format differs between these programs, we discriminated it using the wildcard character asterisk (\*).

**Table 2.** *Studies Reporting of Implementation Outcomes, Adaptations, Barriers and Facilitators.*

| Study                 | Implementation Outcomes |                |                 |      |             |                |             |                | Adaptations | Barriers/Facilitators |
|-----------------------|-------------------------|----------------|-----------------|------|-------------|----------------|-------------|----------------|-------------|-----------------------|
|                       | Acceptability           | Adoption       | Appropriateness | Cost | Feasibility | Fidelity       | Penetration | Sustainability |             |                       |
| Aalborg et al. (2010) | -                       | -              | -               | -    | -           | R <sup>3</sup> | -           | -              | -           | R                     |
| Aarons et al. (2012)  | -                       | -              | -               | -    | -           | R <sup>3</sup> | -           | -              | R           | R                     |
| Abdala et al. (2020)  | -                       | R <sup>1</sup> | -               | -    | -           | -              | -           | -              | R           | R                     |
| Akin et al. (2016a)   | -                       | -              | -               | -    | -           | R <sup>1</sup> | -           | -              | R           | R                     |

| Study                         | Implementation Outcomes |                |                 |      |                |                |             |                | Adaptations | Barriers/Facilitators |
|-------------------------------|-------------------------|----------------|-----------------|------|----------------|----------------|-------------|----------------|-------------|-----------------------|
|                               | Acceptability           | Adoption       | Appropriateness | Cost | Feasibility    | Fidelity       | Penetration | Sustainability |             |                       |
| Akin et al. (2016b)           | R <sup>3</sup>          | R <sup>3</sup> | R <sup>3</sup>  | -    | -              | R <sup>1</sup> | -           | -              | R           | R                     |
| Allchin et al. (2022)         | -                       | -              | -               | -    | -              | -              | -           | R <sup>3</sup> | -           | -                     |
| Álvarez et al. (2016)         | -                       | -              | -               | -    | -              | R <sup>2</sup> | -           | -              | R           | R                     |
| Amador Buenabad et al. (2020) | -                       | -              | -               | -    | -              | R <sup>2</sup> | -           | -              | -           | R                     |
| Amarós-Martí et al. (2016)    | -                       | -              | -               | -    | -              | R <sup>2</sup> | -           | -              | -           | R                     |
| Arim et al. (2017)            | -                       | -              | -               | -    | -              | -              | -           | -              | -           | R                     |
| Arruabarrena et al. (2019)    | -                       | -              | -               | -    | R <sup>3</sup> | -              | -           | -              | R           | R                     |
| Asgary-Eden & Lee (2011)      | -                       | R <sup>3</sup> | -               | -    | -              | R <sup>2</sup> | -           | -              | -           | R                     |
| Ballard (2017)                | R <sup>3</sup>          | -              | -               | -    | R <sup>3</sup> | R <sup>2</sup> | -           | -              | R           | -                     |
| Bamberger (2016)              | -                       | -              | -               | -    | -              | -              | -           | -              | -           | R                     |
| Barnett et al. (2014)         | -                       | -              | -               | -    | -              | R <sup>2</sup> | -           | R <sup>3</sup> | -           | R                     |
| Barnett et al. (2021)         | -                       | -              | -               | -    | -              | -              | -           | R <sup>3</sup> | -           | R                     |
| Bartley (2017)                | -                       | -              | -               | -    | -              | R <sup>3</sup> | -           | -              | -           | R                     |
| Berkel et al. (2013)          | -                       | -              | -               | -    | -              | R <sup>2</sup> | -           | -              | R           | R                     |

| Study                      | Implementation Outcomes |                |                 |                |             |                |                |                | Adaptations | Barriers/Facilitators |
|----------------------------|-------------------------|----------------|-----------------|----------------|-------------|----------------|----------------|----------------|-------------|-----------------------|
|                            | Acceptability           | Adoption       | Appropriateness | Cost           | Feasibility | Fidelity       | Penetration    | Sustainability |             |                       |
| Berkel et al. (2018)       | -                       | -              | -               | -              | -           | R <sup>2</sup> | -              | -              | -           | -                     |
| Bloomquist et al. (2016)   | -                       | -              | -               | -              | -           | R <sup>3</sup> | -              | R <sup>3</sup> | R           | -                     |
| Brabson et al. (2021)      | -                       | -              | -               | -              | -           | -              | -              | R <sup>2</sup> | -           | R                     |
| Brabson (2017)             | -                       | -              | -               | -              | -           | -              | -              | -              | -           | R                     |
| Breitenstein et al. (2010) | -                       | -              | -               | -              | -           | R <sup>3</sup> | -              | -              | -           | R                     |
| Breitkreuz et al. (2011)   | -                       | -              | -               | -              | -           | -              | -              | -              | R           | R                     |
| Butler (2019)              | -                       | -              | -               | -              | -           | -              | -              | -              | -           | R                     |
| Cantu et al. (2010)        | -                       | -              | -               | -              | -           | R <sup>3</sup> | -              | -              | -           | -                     |
| Chaffin et al. (2016)      | -                       | -              | -               | -              | -           | R <sup>2</sup> | -              | -              | R           | -                     |
| Charest & Gagné (2019a)    | -                       | -              | -               | -              | -           | -              | -              | -              | -           | R                     |
| Charest & Gagné (2019b)    | -                       | R <sup>3</sup> | -               | -              | -           | -              | R <sup>3</sup> | -              | -           | R                     |
| Chase et al. (2019)        | -                       | -              | -               | -              | -           | R <sup>2</sup> | -              | -              | -           | R                     |
| Chlebowski et al. (2018)   | -                       | -              | -               | -              | -           | R <sup>2</sup> | -              | -              | -           | R                     |
| Christian et al. (2014)    | -                       | -              | -               | R <sup>1</sup> | -           | -              | -              | R <sup>3</sup> | -           | R                     |

| Study                         | Implementation Outcomes |          |                 |                |                |                |             |                | Adaptations | Barriers/Facilitators |
|-------------------------------|-------------------------|----------|-----------------|----------------|----------------|----------------|-------------|----------------|-------------|-----------------------|
|                               | Acceptability           | Adoption | Appropriateness | Cost           | Feasibility    | Fidelity       | Penetration | Sustainability |             |                       |
| Clarke (2013)                 | -                       | -        | -               | -              | -              | -              | -           | -              | -           | R                     |
| Clay (2018)                   | -                       | -        | R <sup>3</sup>  | -              | -              | -              | -           | -              | -           | R                     |
| Cluver et al. (2016)          | R <sup>3</sup>          | -        | -               | -              | -              | R <sup>3</sup> | -           | -              | -           | R                     |
| Cooper et al. (2016)          | -                       | -        | -               | -              | -              | -              | -           | -              | R           | -                     |
| Côté & Gagné (2020a)          | -                       | -        | -               | -              | -              | -              | -           | -              | -           | R                     |
| Côté & Gagné (2020b)          | -                       | -        | -               | -              | -              | -              | -           | -              | R           | R                     |
| Dababnah & Parish (2014)      | R <sup>3</sup>          | -        | -               | -              | -              | -              | -           | -              | R           | R                     |
| Dawson-Squibb et al. (2022)   | R <sup>3</sup>          | -        | -               | -              | R <sup>3</sup> | R <sup>3</sup> | -           | -              | -           | R                     |
| De Paul et al. (2015)         | R <sup>2</sup>          | -        | -               | R <sup>3</sup> | -              | R <sup>2</sup> | -           | -              | R           | R                     |
| Delawarde-Saïas et al. (2018) | -                       | -        | -               | -              | -              | -              | -           | -              | -           | R                     |
| Denard (2017)                 | -                       | -        | -               | -              | -              | -              | -           | -              | -           | R                     |
| Estrada et al. (2017)         | -                       | -        | -               | -              | -              | R <sup>3</sup> | -           | -              | -           | -                     |
| Estrada et al. (2018)         | -                       | -        | -               | -              | -              | R <sup>3</sup> | -           | -              | R           | -                     |
| Fang et al. (2022)            | R <sup>2</sup>          | -        | -               | -              | -              | R <sup>3</sup> | -           | -              | -           | R                     |

| Study                     | Implementation Outcomes |                |                 |                |             |                |                |                | Adaptations | Barriers/Facilitators |
|---------------------------|-------------------------|----------------|-----------------|----------------|-------------|----------------|----------------|----------------|-------------|-----------------------|
|                           | Acceptability           | Adoption       | Appropriateness | Cost           | Feasibility | Fidelity       | Penetration    | Sustainability |             |                       |
| Fawley-King et al. (2014) | -                       | -              | -               | -              | -           | R <sup>1</sup> | -              | -              | R           | -                     |
| Fowles et al. (2018)      | -                       | -              | -               | -              | -           | -              | -              | -              | R           | -                     |
| Frantz et al. (2015)      | -                       | -              | -               | -              | -           | R <sup>1</sup> | R <sup>3</sup> | R <sup>3</sup> | -           | R                     |
| Gagnon (2016)             | -                       | -              | -               | -              | -           | R <sup>3</sup> | -              | -              | R           | -                     |
| Gallitto et al. (2018)    | -                       | -              | -               | -              | -           | R <sup>2</sup> | -              | -              | -           | R                     |
| Garcia et al. (2020)      | -                       | -              | -               | -              | -           | R <sup>1</sup> | -              | -              | -           | R                     |
| Glazemakers (2012)        | -                       | -              | -               | -              | -           | -              | -              | -              | R           | R                     |
| Gomi (2015)               | -                       | -              | -               | -              | -           | -              | -              | -              | R           | R                     |
| Gordon & Cooper (2015)    | -                       | -              | -               | -              | -           | R <sup>2</sup> | -              | -              | R           | R                     |
| Guastafarro et al. (2017) | -                       | -              | -               | -              | -           | R <sup>1</sup> | -              | -              | R           | R                     |
| Haroz et al. (2019)       | -                       | -              | -               | -              | -           | -              | -              | -              | R           | R                     |
| Heerman et al. (2018)     | -                       | R <sup>3</sup> | -               | -              | -           | R <sup>3</sup> | -              | R <sup>3</sup> | R           | R                     |
| Herschell et al. (2021)   | -                       | -              | -               | R <sup>3</sup> | -           | -              | -              | R <sup>3</sup> | R           | R                     |
| Hickey et al. (2018)      | -                       | R <sup>1</sup> | R <sup>1</sup>  | -              | -           | -              | -              | -              | -           | R                     |





| Study                       | Implementation Outcomes |                |                 |      |                |                |             |                | Adaptations | Barriers/Facilitators |
|-----------------------------|-------------------------|----------------|-----------------|------|----------------|----------------|-------------|----------------|-------------|-----------------------|
|                             | Acceptability           | Adoption       | Appropriateness | Cost | Feasibility    | Fidelity       | Penetration | Sustainability |             |                       |
| Lengnick-Hall et al. (2019) | -                       | -              | -               | -    | -              | -              | -           | -              | R           | -                     |
| Lent (2022)                 | R <sup>3</sup>          | -              | -               | -    | -              | -              | -           | -              | -           | -                     |
| Lewis et al. (2016)         | R <sup>3</sup>          | -              | R <sup>3</sup>  | -    | -              | R <sup>2</sup> | -           | -              | -           | R                     |
| Liebsack (2019)             | R <sup>2</sup>          | -              | -               | -    | -              | -              | -           | -              | -           | R                     |
| Lindsay et al. (2011)       | -                       | -              | -               | -    | -              | R <sup>2</sup> | -           | -              | -           | -                     |
| Love et al. (2016)          | R <sup>3</sup>          | -              | -               | -    | R <sup>3</sup> | -              | -           | -              | -           | R                     |
| Lyon & Budd (2010)          | R <sup>3</sup>          | -              | -               | -    | -              | R <sup>3</sup> | -           | -              | -           | R                     |
| Lyons et al. (2022)         | -                       | -              | -               | -    | -              | R <sup>3</sup> | -           | -              | -           | -                     |
| Margolis (2013)             | -                       | R <sup>2</sup> | -               | -    | R <sup>2</sup> | R <sup>3</sup> | -           | -              | R           | -                     |
| Mathias et al. (2022)       | R <sup>3</sup>          | -              | -               | -    | R <sup>3</sup> | R <sup>3</sup> | -           | -              | R           | R                     |
| Matos et al. (2006)         | R <sup>3</sup>          | -              | -               | -    | -              | -              | -           | -              | R           | R                     |
| Matsumoto et al. (2007)     | R <sup>3</sup>          | -              | -               | -    | -              | -              | -           | -              | -           | -                     |
| Mauricio et al. (2019)      | -                       | -              | -               | -    | -              | R <sup>2</sup> | -           | -              | -           | -                     |
| McCoy et al. (2021)         | -                       | -              | -               | -    | R <sup>3</sup> | R <sup>3</sup> | -           | -              | R           | R                     |
| McDonald et al. (2012)      | -                       | -              | -               | -    | -              | R <sup>2</sup> | -           | -              | R           | R                     |



| Study                       | Implementation Outcomes |                |                 |                |                |                |                |                | Adaptations | Barriers/Facilitators |
|-----------------------------|-------------------------|----------------|-----------------|----------------|----------------|----------------|----------------|----------------|-------------|-----------------------|
|                             | Acceptability           | Adoption       | Appropriateness | Cost           | Feasibility    | Fidelity       | Penetration    | Sustainability |             |                       |
| Osburn (2013)               | R <sup>3</sup>          | -              | -               | -              | -              | R <sup>3</sup> | -              | -              | -           | R                     |
| Owens (2019)                | -                       | -              | R <sup>2</sup>  | R <sup>1</sup> | -              | R <sup>2</sup> | -              | -              | -           | -                     |
| Parker et al. (2020)        | R <sup>2</sup>          | R <sup>1</sup> | R <sup>1</sup>  | -              | R <sup>3</sup> | R <sup>3</sup> | -              | R <sup>1</sup> | R           | R                     |
| Parra Cardona et al. (2012) | -                       | -              | -               | -              | -              | -              | -              | -              | R           | R                     |
| Patras & Klest (2016)       | -                       | -              | -               | -              | -              | -              | -              | -              | -           | R                     |
| Patrick et al. (2008)       | -                       | -              | -               | -              | -              | -              | -              | -              | -           | R                     |
| Pickard et al. (2016)       | R <sup>3</sup>          | -              | -               | -              | -              | -              | -              | -              | -           | R                     |
| Polaha et al. (2018)        | -                       | -              | -               | -              | -              | -              | R <sup>3</sup> | -              | -           | -                     |
| Porta et al. (2018)         | -                       | -              | -               | -              | -              | -              | -              | -              | R           | R                     |
| Poulsen et al. (2010)       | -                       | -              | -               | -              | -              | R <sup>2</sup> | -              | -              | R           | R                     |
| Puffer et al. (2017)        | R <sup>3</sup>          | R <sup>1</sup> | -               | -              | -              | -              | -              | -              | R           | -                     |
| Quetsch (2019)              | R <sup>3</sup>          | -              | -               | R <sup>3</sup> | -              | R <sup>2</sup> | -              | -              | -           | R                     |
| Ramos (2019)                | -                       | -              | -               | -              | -              | R <sup>3</sup> | -              | -              | -           | -                     |
| Romney et al. (2014)        | -                       | -              | -               | R <sup>1</sup> | -              | -              | -              | -              | -           | R                     |
| Roosa Ordway et al. (2018)  | R <sup>1</sup>          | -              | -               | -              | -              | R <sup>2</sup> | -              | -              | -           | R                     |

| Study                                 | Implementation Outcomes |                |                 |                |                |                |                |                | Adaptations | Barriers/Facilitators |
|---------------------------------------|-------------------------|----------------|-----------------|----------------|----------------|----------------|----------------|----------------|-------------|-----------------------|
|                                       | Acceptability           | Adoption       | Appropriateness | Cost           | Feasibility    | Fidelity       | Penetration    | Sustainability |             |                       |
| Rudo-Stern (2019)                     | -                       | -              | -               | -              | -              | R <sup>2</sup> | -              | -              | -           | -                     |
| Saldana et al. (2021)                 | -                       | -              | -               | R <sup>2</sup> | -              | R <sup>3</sup> | -              | -              | -           | -                     |
| Scudder & Herschell (2015)            | -                       | -              | -               | -              | -              | -              | -              | -              | -           | R                     |
| Scudder et al. (2017)                 | -                       | -              | -               | -              | -              | R <sup>2</sup> | -              | R <sup>3</sup> | -           | R                     |
| Self-Brown et al. (2011)              | R <sup>1</sup>          | -              | -               | -              | -              | R <sup>1</sup> | -              | -              | R           | R                     |
| Shapiro & Charest (2020)              | -                       | -              | -               | -              | -              | R <sup>1</sup> | -              | -              | -           | R                     |
| Shapiro et al. (2015)                 | R <sup>3</sup>          | -              | -               | -              | R <sup>3</sup> | R <sup>1</sup> | -              | R <sup>3</sup> | R           | R                     |
| Sigmarsdóttir & Guðmundsdóttir (2013) | -                       | -              | -               | -              | -              | R <sup>3</sup> | -              | -              | R           | -                     |
| Sim et al. (2020)                     | R <sup>3</sup>          | -              | -               | -              | -              | -              | -              | -              | -           | -                     |
| Skale et al. (2020)                   | -                       | -              | -               | -              | -              | R <sup>2</sup> | -              | R <sup>3</sup> | R           | R                     |
| Smith et al. (2015)                   | R <sup>3</sup>          | R <sup>1</sup> | -               | -              | R <sup>3</sup> | R <sup>3</sup> | R <sup>3</sup> | -              | R           | R                     |
| Stern et al. (2008)                   | -                       | -              | -               | -              | -              | R <sup>3</sup> | -              | -              | -           | R                     |
| Stokes (2014)                         | R <sup>3</sup>          | -              | -               | -              | -              | R <sup>3</sup> | -              | -              | R           | R                     |

| Study                          | Implementation Outcomes |                |                 |      |                |                |             |                | Adaptations | Barriers/Facilitators |
|--------------------------------|-------------------------|----------------|-----------------|------|----------------|----------------|-------------|----------------|-------------|-----------------------|
|                                | Acceptability           | Adoption       | Appropriateness | Cost | Feasibility    | Fidelity       | Penetration | Sustainability |             |                       |
| Suchman et al. (2020)          | R <sup>1</sup>          | -              | -               | -    | R <sup>3</sup> | -              | -           | -              | R           | R                     |
| Taylor et al. (2015)           | -                       | -              | -               | -    | -              | R <sup>3</sup> | -           | -              | -           | -                     |
| Thomson et al. (2014)          | -                       | -              | -               | -    | -              | R <sup>1</sup> | -           | -              | -           | R                     |
| Turner & Sanders (2006)        | R <sup>3</sup>          | -              | -               | -    | -              | R <sup>3</sup> | -           | -              | -           | -                     |
| Weaver et al. (2011)           | -                       | R <sup>2</sup> | -               | -    | -              | -              | -           | -              | -           | R                     |
| Webster-Stratton et al. (2014) | -                       | -              | -               | -    | -              | R <sup>3</sup> | -           | -              | -           | -                     |
| West et al. (2022)             | R <sup>3</sup>          | -              | R <sup>3</sup>  | -    | R <sup>3</sup> | -              | -           | -              | -           | R                     |
| Whitaker et al. (2012)         | -                       | -              | -               | -    | -              | R <sup>3</sup> | -           | -              | -           | R                     |
| Whitaker et al. (2015)         | -                       | -              | -               | -    | -              | -              | -           | -              | -           | R                     |
| Woodfield et al. (2021)        | R <sup>3</sup>          | -              | -               | -    | -              | -              | -           | -              | R           | R                     |
| Yingling et al. (2020)         | R <sup>3</sup>          | -              | -               | -    | R <sup>3</sup> | R <sup>1</sup> | -           | -              | R           | R                     |
| Zerón (2017)                   | -                       | -              | -               | -    | -              | -              | -           | -              | R           | R                     |

*Note.* R = Reported by the study; R<sup>1</sup> = The study just mentioned the implementation outcome; R<sup>2</sup> = The study monitored the implementation outcome; R<sup>3</sup> = The study measured the implementation outcome (i.e., presented the results).

## References of the Included Studies (n = 145)

- Aalborg, A. E., Miller, B. A., Husson, G., Byrnes, H. F., Bauman, K. E., & Spoth, R. L. (2010). Implementation of adolescent family-based substance use prevention programmes in health care settings: Comparisons across conditions and programmes. *Health Education Journal*, *71*(1), 53–61. <https://doi.org/10.1177/0017896910386209>
- Aarons, G. A., Miller, E. A., Green, A. E., Perrott, J. A., & Bradway, R. (2012). Adaptation happens: A qualitative case study of implementation of the Incredible Years evidence-based parent training programme in a residential substance abuse treatment programme. *Journal of Children's Services*, *7*(4), 233–245. <https://doi.org/10.1108/17466661211286463>
- Abdala, I. G., Murta, S. G., Menezes, J. C. L. D., Nobre-Sandoval, L. D. A., Gomes, M. D. S. M., Duailibe, K. D., & Farias, D. A. (2020). Barriers and facilitators in the Strengthening Families Program (SFP 10–14) implementation process in Northeast Brazil: A retrospective qualitative study. *International Journal of Environmental Research and Public Health*, *17*(19), 6979. <https://doi.org/10.3390/ijerph17196979>
- Akin, B. A., Brook, J., Byers, K. D., & Lloyd, M. H. (2016a). Worker perspectives from the front line: Implementation of evidence-based interventions in child welfare settings. *Journal of Child and Family Studies*, *25*(3), 870–882. <https://doi.org/10.1007/s10826-015-0283-7>
- Akin, B. A., Brook, J., Lloyd, M. H., Bhattarai, J., Johnson-Motoyama, M., & Moses, M. (2016b). A study in contrasts: Supports and barriers to successful implementation of two evidence-based parenting interventions in child welfare. *Child Abuse & Neglect*, *57*, 30–40. <https://doi.org/10.1016/j.chiabu.2016.06.002>
- Allchin, B., Weimand, B. M., O'Hanlon, B., & Goodyear, M. (2022). A sustainability model for family-focused practice in adult mental health services. *Frontiers in Psychiatry*, *12*, 761889. <https://doi.org/10.3389/fpsy.2021.761889>
- Álvarez, M., Padilla, S., & Máiquez, M. L. (2016). Home and group-based implementation of the “Growing Up Happily in the Family” program in at-risk psychosocial contexts. *Psychosocial Intervention*, *25*(2), 69–78. <https://doi.org/10.1016/j.psi.2016.03.006>
- Amador Buenabad, N. G., Sánchez Ramos, R., Schwartz, S., Gutiérrez López, M. L., Díaz Juárez, A. D., Ortiz Gallegos, A. B., González Ortega, T. G., Vázquez Pérez, L., Medina-Mora Icaza, M. E., Domenech Rodríguez, M. M., & Villatoro Velázquez, J. A. (2020). Cluster randomized trial of a

multicomponent school-based program in Mexico to prevent behavioral problems and develop social skills in children. *Child & Youth Care Forum*, 49(3), 343–364.

<https://doi.org/10.1007/s10566-019-09535-3>

Amorós-Martí, P., Byrne, S., Mateos-Inchaurredo, A., Vaquero-Tió, E., & Mundet-Bolós, A. (2016).

“Learning together, growing with family”: The implementation and evaluation of a family support programme. *Psychosocial Intervention*, 25(2), 87–93.

<https://doi.org/10.1016/j.psi.2016.02.002>

Arim, R. G., Guevremont, A., Dahinten, V. S., & Kohen, D. E. (2017). The use of administrative data to study the Triple P – Positive Parenting Program. *International Journal of Child, Youth and Family Studies*, 8(3/4), 59. <https://doi.org/10.18357/ijcyfs83/4201718001>

Arruabarrena, I., de Paul, J., & Cañas, M. (2019). Implementation of an early preventive intervention programme for child neglect: SafeCare. *Psicothema*, 31(4), 443–449.

<https://doi.org/10.7334/psicothema2019.190>

Asgary-Eden, V., & Lee, C. M. (2011). So now we’ve picked an evidence-based program, what’s next?

Perspectives of service providers and administrators. *Professional Psychology: Research and Practice*, 42(2), 169–175. <https://doi.org/10.1037/a0022745>

Ballard, J., & Wieling, E. (2017). *Assessing the feasibility of implementing a parenting intervention with Karen refugees*. (Publication No. 10287020) [Doctoral dissertation, University of Minnesota]. ProQuest Dissertations and Theses Global.

Barnett, E. R., Rosenberg, H. J., Rosenberg, S. D., Osofsky, J. D., & Wolford, G. L. (2014).

Dissemination and implementation of child-parent psychotherapy in rural public health agencies. *Child and Adolescent Mental Health*, 19(3), 215–218. <https://doi.org/10.1111/camh.12041>

Barnett, M., Brookman-Frazee, L., Yu, S. H., Lind, T., Lui, J., Timmer, S., Boys, D., Urquiza, A., Innes-Gomberg, D., Quick-Abdullah, D., & Lau, A. S. (2021). Train-to-Sustain: Predictors of sustainment in a large-scale implementation of Parent–Child Interaction Therapy. *Evidence-Based Practice in Child and Adolescent Mental Health*, 6(2), 262–276.

<https://doi.org/10.1080/23794925.2020.1855613>

Bartley, L. (2017). *Making it happen: Understanding factors related to worker and organizational fidelity to Family Connections, a child maltreatment prevention program* (Publication No. 10277695)

[Doctoral dissertation, Faculty of the Graduate School of the University of Maryland]. ProQuest

Dissertations and Theses Global.

- Berkel, C., McBride Murry, V., Roulston, K. J., & Brody, G. H. (2013). Understanding the art and science of implementation in the SAAF efficacy trial. *Health Education, 113*(4), 297–323. <https://doi.org/10.1108/09654281311329240>
- Berkel, C., Sandler, I. N., Wolchik, S. A., Brown, C. H., Gallo, C. G., Chiapa, A., Mauricio, A. M., & Jones, S. (2018). “Home practice is the program”: Parents’ practice of program skills as predictors of outcomes in the New Beginnings Program effectiveness trial. *Prevention Science, 19*(5), 663–673. <https://doi.org/10.1007/s11121-016-0738-0>
- Bloomquist, M. L., Giovanelli, A., Benton, A., Piehler, T. F., Quevedo, K., & Oberstar, J. (2016). Implementation and evaluation of evidence-based psychotherapeutic practices for youth in a mental health organization. *Journal of Child and Family Studies, 25*(11), 3278–3292. <https://doi.org/10.1007/s10826-016-0479-5>
- Brabson, L. A. (2017). *Exploring staff turnover in a large-scale EBT implementation initiative* (Publication No. 10274031) [Master’s thesis, Eberly College of Arts and Sciences at West Virginia University]. ProQuest Dissertations and Theses Global.
- Brabson, L. A., Herschell, A. D., Snider, M. D. H., Jackson, C. B., Schaffner, K. F., Scudder, A. T., Kolko, D. J., & Mrozowski, S. J. (2021). Understanding the effectiveness of the cascading model to implement Parent-Child Interaction Therapy. *The Journal of Behavioral Health Services & Research, 48*(3), 427–445. <https://doi.org/10.1007/s11414-020-09732-2>
- Breitenstein, S. M., Fogg, L., Garvey, C., Hill, C., Resnick, B., & Gross, D. (2010). Measuring implementation fidelity in a community-based parenting intervention. *Nursing Research, 59*(3), 158–165. <https://doi.org/10.1097/NNR.0b013e3181dbb2e2>
- Breitkreuz, R., McConnell, D., Savage, A., & Hamilton, A. (2011). Integrating Triple P into existing family support services: A case study on program implementation. *Prevention Science, 12*(4), 411–422. <https://doi.org/10.1007/s11121-011-0233-6>
- Butler, J. (2019). *An exploration of parenting programmes: Staff and parent experiences of implementation* (Publication No. 28217662) [Doctoral dissertation, Faculty of Biology, Medicine and Health at the University of Manchester]. ProQuest Dissertations and Theses Global.
- Cantu, A., Hill, L., & Becker, L. (2010). Implementation quality of a family-focused preventive



- intervention in a community-based dissemination. *Journal of Children's Services*, 5(4), 18–30.  
<https://doi.org/10.5042/jcs.2010.0692>
- Chaffin, M., Hecht, D., Aarons, G., Fettes, D., Hurlburt, M., & Ledesma, K. (2016). EBT fidelity trajectories across training cohorts using the interagency collaborative team strategy. *Administration and Policy in Mental Health and Mental Health Services Research*, 43(2), 144–156. <https://doi.org/10.1007/s10488-015-0627-z>
- Charest, É., & Gagné, M.-H. (2019a). Measuring and predicting service providers' use of an evidence-based parenting program. *Administration and Policy in Mental Health and Mental Health Services Research*, 46(4), 542–554. <https://doi.org/10.1007/s10488-019-00934-1>
- Charest, É., & Gagné, M.-H. (2019b). Service providers' initial stance toward the adoption of an evidence-based parenting program. *Children and Youth Services Review*, 104, 104410. <https://doi.org/10.1016/j.childyouth.2019.104410>
- Chase, R. M., Carmody, K. A., Lent, M., Murphy, R., Amaya-Jackson, L., Wray, E., Ake, G. S., Sullivan, K., White, D., Gurwitch, R., & Murray, K. (2019). Disseminating parent-child interaction therapy through the learning collaborative model on the adoption and implementation of an evidence-based treatment. *Children and Youth Services Review*, 101, 131–141. <https://doi.org/10.1016/j.childyouth.2019.03.043>
- Chlebowski, C., Magaña, S., Wright, B., & Brookman-Frazee, L. (2018). Implementing an intervention to address challenging behaviors for autism spectrum disorder in publicly-funded mental health services: Therapist and parent perceptions of delivery with Latinx families. *Cultural Diversity and Ethnic Minority Psychology*, 24(4), 552–563. <https://doi.org/10.1037/cdp0000215>
- Christian, A. S., Niec, L. N., Acevedo-Polakovich, I. D., & Kassab, V. A. (2014). Dissemination of an evidence-based parenting program: Clinician perspectives on training and implementation. *Children and Youth Services Review*, 43, 8–17. <https://doi.org/10.1016/j.childyouth.2014.04.005>
- Clarke, S.-A., Calam, R., Morawska, A., & Sanders, M. (2013). Developing web-based Triple P 'Positive Parenting Programme' for families of children with asthma: Triple P for children with asthma. *Child: Care, Health and Development*, 40(4), 492–497. <https://doi.org/10.1111/cch.12073>
- Clay, A. L. (2018). *Population-level implementation of Triple P: Practitioner-reported organizational barriers and facilitators to use* [Doctoral dissertation, Graduate Faculty of North Carolina State University]. <http://www.lib.ncsu.edu/resolver/1840.20/35061>

- Cluver, L., Meinck, F., Yakubovich, A., Doubt, J., Redfern, A., Ward, C., Salah, N., De Stone, S., Petersen, T., Mpimpilashe, P., Romero, R. H., Ncobo, L., Lachman, J., Tsoanyane, S., Shenderovich, Y., Loening, H., Byrne, J., Sherr, L., Kaplan, L., & Gardner, F. (2016). Reducing child abuse amongst adolescents in low- and middle-income countries: A pre-post trial in South Africa. *BMC Public Health, 16*(1), 567. <https://doi.org/10.1186/s12889-016-3262-z>
- Cooper, B. R., Shrestha, G., Hyman, L., & Hill, L. (2016). Adaptations in a community-based family intervention: Replication of two coding schemes. *The Journal of Primary Prevention, 37*(1), 33–52. <https://doi.org/10.1007/s10935-015-0413-4>
- Côté, M.-K., & Gagné, M.-H. (2020a). Changes in practitioners' attitudes, perceived training needs and self-efficacy over the implementation process of an evidence-based parenting program. *BMC Health Services Research, 20*(1), 1092. <https://doi.org/10.1186/s12913-020-05939-3>
- Côté, M.-K., & Gagné, M.-H. (2020b). Diversity in practitioners' perspectives on the implementation of the evidence-based Triple P—Positive Parenting Program. *Journal of Community & Applied Social Psychology, 30*(5), 480–493. <https://doi.org/10.1002/casp.2458>
- Dababnah, S., & Parish, S. L. (2014). Incredible Years Program tailored to parents of preschoolers with autism: Pilot results. *Research on Social Work Practice, 26*(4), 372–385. <https://doi.org/10.1177/1049731514558004>
- Dawson-Squibb, J.-J., Davids, E. L., Chase, R., Puffer, E., Rasmussen, J. D. M., Franz, L., & De Vries, P. J. (2022). Bringing Parent–Child Interaction Therapy to South Africa: Barriers and facilitators and overall feasibility: First steps to implementation. *International Journal of Environmental Research and Public Health, 19*(8), 4450. <https://doi.org/10.3390/ijerph19084450>
- De Paul, J., Arruabarrena, I., & Indias, S. (2015). Implantación piloto de dos programas basados en la evidencia (SafeCare e Incredible Years) en los Servicios de Protección Infantil de Gipuzkoa (España) [Pilot Implementation of two evidence-based programs (SafeCare and Incredible Years) in child protection services in Gipuzkoa (Spain)]. *Psychosocial Intervention, 24*(2), 105–120. <https://doi.org/10.1016/j.psi.2015.07.001>
- Delawarde-Saias, C., Gagné, M.-H., Brunson, L., & Drapeau, S. (2018). Implementing a multilevel prevention strategy under an intersectoral partnership: The case of the Triple P Program. *Children and Youth Services Review, 88*, 170–179. <https://doi.org/10.1016/j.childyouth.2018.03.009>

- Denard, C. (2017). *Child welfare caseworkers: A pivotal role in the uptake of evidence-based practices*. [Doctor dissertation, University of Pennsylvania].  
<https://repository.upenn.edu/edissertations/2253>
- Estrada, Y., Lee, T. K., Huang, S., Tapia, M. I., Velázquez, M.-R., Martinez, M. J., Pantin, H., Ocasio, M. A., Vidot, D. C., Molleda, L., Villamar, J., Stepanenko, B. A., Brown, C. H., & Prado, G. (2017). Parent-centered prevention of risky behaviors among Hispanic youths in Florida. *American Journal of Public Health, 107*(4), 607–613.  
<https://doi.org/10.2105/AJPH.2017.303653>
- Estrada, Y., Lee, T. K., Wagstaff, R., M. Rojas, L., Tapia, M. I., Velázquez, M. R., Sardinias, K., Pantin, H., Sutton, M. Y., & Prado, G. (2018). eHealth Familias Unidas: Efficacy trial of an evidence-based intervention adapted for use on the internet with Hispanic families. *Prevention Science, 20*(1), 68–77. <https://doi.org/10.1007/s11121-018-0905-6>
- Fang, Z., Lachman, J. M., Qiao, D., & Barlow, J. (2022). Controlled trial of a short-term intensive parent training program within the context of routine services for autistic children in China. *Psychosocial Intervention, 31*(2), 121–131. <https://doi.org/10.5093/pi2022a9>
- Fawley-King, K., Trask, E., E. Calderón, N., A. Aarons, G., & F. Garland, A. (2014). Implementation of an evidence-based parenting programme with a Latina population: Feasibility and preliminary outcomes. *Journal of Children's Services, 9*(4), 295–306. <https://doi.org/10.1108/JCS-04-2014-0024>
- Fowles, T. R., Masse, J. J., McGoron, L., Beveridge, R. M., Williamson, A. A., Smith, M. A., & Parrish, B. P. (2018). Home-based vs. clinic-based Parent–Child Interaction Therapy: Comparative effectiveness in the context of dissemination and implementation. *Journal of Child and Family Studies, 27*(4), 1115–1129. <https://doi.org/10.1007/s10826-017-0958-3>
- Frantz, I., Stemmler, M., Hahlweg, K., Plück, J., & Heinrichs, N. (2015). Experiences in disseminating evidence-based prevention programs in a real-world setting. *Prevention Science, 16*(6), 789–800. <https://doi.org/10.1007/s11121-015-0554-y>
- Gagnon, D. (2016). *Partnering with parents to promote high school graduation: An evidence-based program evaluation* [Master's thesis, University of Washington].  
<http://hdl.handle.net/1773/36446>
- Gallitto, E., Romano, E., & Drolet, M. (2018). Caregivers' perspectives on the SafeCare® programme:

- Implementing an evidence-based intervention for child neglect. *Child & Family Social Work*, 23(2), 307–315. <https://doi.org/10.1111/cfs.12419>
- Garcia, A. R., Myers, C., Morones, S., Ohene, S., & Kim, M. (2020). “It starts from the top”: Caseworkers, supervisors, and Triple P providers’ perceptions of implementation processes and contexts. *Human Service Organizations: Management, Leadership & Governance*, 44(3), 266–293. <https://doi.org/10.1080/23303131.2020.1755759>
- Glazemakers, I. (2012). *A population health approach to parenting support: Disseminating the Triple P-Positive Parenting Program in the province of Antwerp* (Publication No. 3535436) [Doctoral dissertation, University of Antwerp]. ProQuest Dissertations and Theses Global.
- Gomi, S. (2015). *Therapists’ insights about the cultural adaptation of evidence-based parent training* (Publication No. 3745991) [Doctoral dissertation, Graduate Faculty of the University of Kansas]. ProQuest Dissertations and Theses Global.
- Gordon, H. M., & Cooper, L. D. (2015). A case study of Parent–Child Interaction Therapy: Flexible client-centered adaptation of an EST. *Clinical Case Studies*, 15(2), 126–142. <https://doi.org/10.1177/1534650115603819>
- Guastaferrero, K., Miller, K., Shanley Chatham, J. R., Whitaker, D. J., McGilly, K., & Lutzker, J. R. (2017). Systematic braiding of two evidence-based parent training programs: Qualitative results from the pilot phase. *Family & Community Health*, 40(1), 88–97. <https://doi.org/10.1097/FCH.000000000000129>
- Haroz, E. E., Ingalls, A., Wadlin, J., Kee, C., Begay, M., Neault, N., & Barlow, A. (2019). Utilizing broad-based partnerships to design a precision approach to implementing evidence-based home visiting. *Journal of Community Psychology*, 48(4), 1100–1113. <https://doi.org/10.1002/jcop.22281>
- Heerman, W. J., Schludnt, D., Harris, D., Teeters, L., Apple, R., & Barkin, S. L. (2018). Scale-out of a community-based behavioral intervention for childhood obesity: Pilot implementation evaluation. *BMC Public Health*, 18(1), 498. <https://doi.org/10.1186/s12889-018-5403-z>
- Herschell, A. D., Shaffer, S. L., Wallace, N. M., Maise, A. A., Schaffner, K. F., McNeil, C. B., Dotson, P., & Johnson, V. J. (2021). Hybrid implementation effectiveness trial: Home-based intensive family coaching to improve outcomes for medicaid-enrolled preschoolers. *Evidence-Based Practice in Child and Adolescent Mental Health*, 6(2), 246–261.

<https://doi.org/10.1080/23794925.2021.1908191>

Hickey, G., McGilloway, S., O'Brien, M., Leckey, Y., Devlin, M., & Donnelly, M. (2018). Strengthening stakeholder buy-in and engagement for successful exploration and installation: A case study of the development of an area-wide, evidence-based prevention and early intervention strategy. *Children and Youth Services Review, 91*, 185–195.

<https://doi.org/10.1016/j.chilyouth.2018.06.008>

Hill, L. G., Maucione, K., & K. Hood, B. (2007). A focused approach to assessing program fidelity.

*Prevention Science, 8*(1), 25–34. <https://doi.org/10.1007/s11121-006-0051-4>

Hill, L. G., Cooper, B. R., & Parker, L. A. (2018). Qualitative comparative analysis: A mixed-method tool for complex implementation questions. *The Journal of Primary Prevention, 40*(1), 69–87.

<https://doi.org/10.1007/s10935-019-00536-5>

Hodge, L. M., Turner, K. M. T., Sanders, M. R., & Forster, M. (2017). Factors that influence evidence-based program sustainment for family support providers in child protection services in disadvantaged communities. *Child Abuse & Neglect, 70*, 134–145.

<https://doi.org/10.1016/j.chiabu.2017.05.017>

Huebner, R. A., Hall, M. T., Walton, M. T., Smead, E., Willauer, T., & Posze, L. (2021). The Sobriety Treatment and Recovery Teams program for families with parental substance use: Comparison of child welfare outcomes through 12 months post-intervention. *Child Abuse & Neglect, 120*,

105260. <https://doi.org/10.1016/j.chiabu.2021.105260>

Ionutiu, R. D. (2016). The effectiveness of a positive parenting program: Results of a preliminary study in a Romanian sample. *Cognition, Brain, Behavior: An Interdisciplinary Journal, 20*(3), 141–158.

Jackson, C. B., Herschell, A. D., Schaffner, K. F., Turiano, N. A., & McNeil, C. B. (2017). Training community-based clinicians in parent-child interaction therapy: The interaction between expert consultation and caseload. *Professional Psychology: Research and Practice, 48*(6), 481–489.

<https://doi.org/10.1037/pro0000149>

Kerns, S. E. U., McCormick, E., Negrete, A., Carey, C., Haaland, W., & Waller, S. (2017). Predicting post-training implementation of a parenting intervention. *Journal of Children's Services, 12*(4), 302–315. <https://doi.org/10.1108/JCS-04-2017-0015>

Klest, S. K. (2014). Clustering practitioners within service organizations may improve implementation outcomes for evidence-based programs. *Zeitschrift Für Psychologie, 222*(1), 30–36.

<https://doi.org/10.1027/2151-2604/a000163>

- Kumpfer, K. L., Rie, J., & O'Driscoll, R. (2012). Effectiveness of a culturally adapted strengthening families program 12–16 years for high-risk Irish families. *Child & Youth Care Forum, 41*(2), 173–195. <https://doi.org/10.1007/s10566-011-9168-0>
- Kutash, K., Cross, B., Madias, A., Duchnowski, A. J., & Green, A. L. (2012). Description of a fidelity implementation system: An example from a community-based children's mental health program. *Journal of Child and Family Studies, 21*(6), 1028–1040. <https://doi.org/10.1007/s10826-012-9565-5>
- Lachman, J. M., Kelly, J., Cluver, L., Ward, C. L., Hutchings, J., & Gardner, F. (2016). Process evaluation of a parenting program for low-income families in South Africa. *Research on Social Work Practice, 28*(2), 188–202. <https://doi.org/10.1177/1049731516645665>
- Lanier, P., Kohl, P. L., Benz, J., Swinger, D., Moussette, P., & Drake, B. (2011). Parent–Child Interaction Therapy in a community setting: Examining outcomes, attrition, and treatment setting. *Research on Social Work Practice, 21*(6), 689–698. <https://doi.org/10.1177/1049731511406551>
- Lau, A. S., Fung, J. J., Ho, L. Y., Liu, L. L., & Gudiño, O. G. (2011). Parent training with high-risk immigrant Chinese families: A pilot group randomized trial yielding practice-based evidence. *Behavior Therapy, 42*(3), 413–426. <https://doi.org/10.1016/j.beth.2010.11.001>
- Leclair M., I.-A., Paquette, G., & Letarte, M.-J. (2017). La fidélité d'implantation d'un programme probant au-delà de son implantation initiale: L'exemple de Ces Années Incroyables en protection de l'enfance de 2003 à 2013 [The fidelity of implementation of a convincing program beyond its initial implementation: The example of the Incredible Years in child protection from 2003 to 2013]. *Canadian Journal of Program Evaluation, 32*(1), 90–108. <https://doi.org/10.3138/cjpe.31142>
- Lee, S. S., August, G. J., Bloomquist, M. L., Mathy, R., & Realmuto, G. M. (2006). Implementing an evidence-based preventive intervention in neighborhood family centers: Examination of perceived barriers to program participation. *The Journal of Primary Prevention, 27*(6), 573–597. <https://doi.org/10.1007/s10935-006-0060-x>
- Lengnick-Hall, R., Fenwick, K., Hurlburt, M. S., Green, A., Askew, R. A., & Aarons, G. A. (2019). Let's talk about adaptation! How individuals discuss adaptation during evidence-based practice implementation. *Journal of Children's Services, 14*(4), 266–277. <https://doi.org/10.1108/JCS-05->

2018-0010

- Lent, J. (2022). *The impact of intensive, group-format Parent-Child Interaction Therapy on positive parenting skills and oppositional behavior of young children* (Publication No. 29255232) [Doctoral dissertation, Hofstra University]. ProQuest Dissertations and Theses Global.
- Lewis, E. M., Feely, M., Seay, K. D., Fedoravicius, N., & Kohl, P. L. (2016). Child welfare involved parents and Pathways Triple P: Perceptions of program acceptability and appropriateness. *Journal of Child and Family Studies, 25*(12), 3760–3770. <https://doi.org/10.1007/s10826-016-0526-2>
- Liebsack, B. K. (2019). *The Parent-Child Interaction Therapy family experiences and feedback study: A follow-up examination of attrition in an evidence-based treatment in community settings statewide* (Publication No. 27527057) [Doctoral dissertation, Eberly College of Arts and Sciences at West Virginia University]. ProQuest Dissertations and Theses Global.
- Lindsay, G., Strand, S., & Davis, H. (2011). A comparison of the effectiveness of three parenting programmes in improving parenting skills, parent mental wellbeing and children's behaviour when implemented on a large scale in community settings in 18 English local authorities: The parenting early intervention pathfinder (PEIP). *BMC Public Health, 11*(1), 962. <https://doi.org/10.1186/1471-2458-11-962>
- Love, S. M., Sanders, M. R., Turner, K. M. T., Mairange, M., Knott, T., Prinz, R., Metzler, C., & Ainsworth, A. T. (2016). Social media and gamification: Engaging vulnerable parents in an online evidence-based parenting program. *Child Abuse & Neglect, 53*, 95–107. <https://doi.org/10.1016/j.chiabu.2015.10.031>
- Lyon, A. R., & Budd, K. S. (2010). A community mental health implementation of Parent-Child Interaction Therapy (PCIT). *Journal of Child and Family Studies, 19*(5), 654–668. <https://doi.org/10.1007/s10826-010-9353-z>
- Lyons, E. R., Nekkanti, A. K., Funderburk, B. W., & Skowron, E. A. (2022). Parent-Child Interaction Therapy supports healthy eating behavior in child welfare-involved children. *International Journal of Environmental Research and Public Health, 19*(17), 10535. <https://doi.org/10.3390/ijerph191710535>
- Margolis, K. L. (2013). *A pilot feasibility and effectiveness trial of the Family Check-Up parenting intervention with Spanish preadolescents and their families: A cultural adaptation and feasibility*

*study to enhance evidence-based intervention research in Spain* (Publication No. 3589532)

[Doctoral dissertation, Graduate School of the University of Oregon]. ProQuest Dissertations and Theses Global.

- Mathias, K., Nayak, P., Singh, P., Pillai, P., & Goicolea, I. (2022). Is the Parwarish parenting intervention feasible and relevant for young people and parents in diverse settings in India? A mixed methods process evaluation. *BMJ Open*, *12*(2), e054553. <https://doi.org/10.1136/bmjopen-2021-054553>
- Matos, M., Torres, R., Santiago, R., Jurado, M., & Rodriguez, I. (2006). Adaptation of Parent-Child Interaction Therapy for Puerto Rican families: A preliminary study. *Family Process*, *45*(2), 205–222. <https://doi.org/10.1111/j.1545-5300.2006.00091.x>
- Matsumoto, Y., Sofronoff, K., & Sanders, M. R. (2007). The efficacy and acceptability of the Triple P-Positive Parenting Program with Japanese parents. *Behaviour Change*, *24*(4), 205–218. <https://doi.org/10.1375/bech.24.4.205>
- Mauricio, A. M., Rudo-Stern, J., Dishion, T. J., Letham, K., & Lopez, M. (2019). Provider readiness and adaptations of competency drivers during scale-up of the Family Check-Up. *The Journal of Primary Prevention*, *40*(1), 51–68. <https://doi.org/10.1007/s10935-018-00533-0>
- McCoy, A., Lachman, J. M., Ward, C. L., Tapanya, S., Poomchaichote, T., Kelly, J., Mukaka, M., Cheah, P. Y., & Gardner, F. (2021). Feasibility pilot of an adapted parenting program embedded within the Thai public health system. *BMC Public Health*, *21*(1), 1009. <https://doi.org/10.1186/s12889-021-11081-4>
- McDonald, L., Coover, G., Sandler, J., Thao, T., & Shalhoub, H. (2012). Cultural adaptation of an evidence-based parenting programme with elders from South East Asia in the US: Co-producing Families and Schools Together – FAST. *Journal of Children's Services*, *7*(2), 113–127. <https://doi.org/10.1108/17466661211238673>
- McWilliams, M. A. (2020). *Texting to Increase the Impact of Parenting (TIIP) program: Examining the effects on parent engagement in the Incredible Years® basic preschool parenting program* [Doctoral dissertation, University of North Carolina]. <https://doi.org/10.17615/rgxd-sy28>
- Miller, F. K., & Keating, D. P. (2013). Implementing an evidence-based parent–child mental health program in a high-risk community. *Canadian Journal of Community Mental Health*, *32*(1), 139–153. <https://doi.org/10.7870/cjcmh-2013-011>
- Miller, K. S., MaRwell, K. D., Fasula, A. M., Parker, J. T., Zackery, S., & Wyckoff, S. C. (2010). Pre-risk



- HIV-prevention paradigm shift: The feasibility and acceptability of the Parents Matter! program in HIV risk communities. *Public Health Reports*, 125(1\_suppl), 38–46.  
<https://doi.org/10.1177/00333549101250S106>
- Murry, V. M., Berkel, C., & Liu, N. (2018). The closing digital divide: Delivery modality and family attendance in the Pathways for African American Success (PAAS) Program. *Prevention Science*, 19(5), 642–651. <https://doi.org/10.1007/s11121-018-0863-z>
- Myers, C., Garcia, A., Beidas, R., Trinh, R., & Yang, Z. (2020). A theory of planned behavior exploration of child welfare caseworker referrals to an evidence-based parenting program. *Journal of Social Service Research*, 46(6), 877–889. <https://doi.org/10.1080/01488376.2019.1705458>
- Nelson, M. M., Shanley, J. R., Funderburk, B. W., & Bard, E. (2012). Therapists' attitudes toward evidence-based practices and implementation of Parent–Child Interaction Therapy. *Child Maltreatment*, 17(1), 47–55. <https://doi.org/10.1177/1077559512436674>
- Nolan, M. F. (2014). *Evaluation of the implementation of the Triple P Positive Parenting Program in PITT county* [Master's thesis, Faculty of the Department of Child Development and Family Relations East Carolina University]. <http://hdl.handle.net/10342/4681>
- Norton, L., Hart, L. M., Butel, F., Moloney, S., O'Connor, N., Attenborough, V., & Roberts, S. (2021). Promoting Confident Body, Confident Child in community child health: A mixed-methods implementation study. *Health Promotion Journal of Australia*, 33(1), 297–305.  
<https://doi.org/10.1002/hpja.487>
- O'Connor, T. M., Perez, O., Beltran, A., Colón García, I., Arredondo, E., Parra Cardona, R., Cabrera, N., Thompson, D., Baranowski, T., & Morgan, P. J. (2020). Cultural adaptation of 'Healthy Dads, Healthy Kids' for Hispanic families: Applying the ecological validity model. *International Journal of Behavioral Nutrition and Physical Activity*, 17(1), 52. <https://doi.org/10.1186/s12966-020-00949-0>
- O'Donovan, L. (2020). *An exploration of the factors that influence practitioners' decision-making in the context of delivering the Strengthening Families Programme*. [Unpublished doctoral dissertation]. National University of Ireland, Cork.
- Ofoha, D., Ogidan, R., & Saidu, R. (2018). Child discipline and violence in Nigeria: A community-based intervention programme to reduce violent discipline and other forms of negative parenting practices. *Review of Education*, 7(3), 455–492. <https://doi.org/10.1002/rev3.3128>

- Ogden, T., Amlund Hagen, K., Askeland, E., & Christensen, B. (2009). Implementing and evaluating evidence-based treatments of conduct problems in children and youth in Norway. *Research on Social Work Practice, 19*(5), 582–591. <https://doi.org/10.1177/1049731509335530>
- Ogden, T., Forgatch, M. S., Askeland, E., Patterson, G. R., & Bullock, B. M. (2005). Implementation of parent management training at the national level: The case of Norway. *Journal of Social Work Practice, 19*(3), 317–329. <https://doi.org/10.1080/02650530500291518>
- Oppenheim-Weller, S., & Zeira, A. (2018). SafeCare in Israel: The challenges of implementing an evidence-based program. *Children and Youth Services Review, 85*, 187–193. <https://doi.org/10.1016/j.childyouth.2017.12.031>
- Orte Socias, C., Ballester Brage, L., Pascual Barrio, B., Gomila Grau, M. A., & Amer Fernández, J. (2016). Las competencias de los formadores en el Programa de Competencia Familiar, un programa de educación familiar basado en la evidencia [The competencies of the trainers in the Family Competence Program, an evidence-based family education program]. *Revista Complutense de Educación, 29*(3), 651–663. <https://doi.org/10.5209/RCED.53547>
- Osburn, J. L. (2013). *An investigation of the effectiveness and transportability of the Incredible Years self-administered parent training program with an at-risk Head Start sample* (Publication No. 3593476) [Doctoral dissertation, Michigan State University]. ProQuest Dissertations and Theses Global.
- Owens, C. R. (2019). *The role of peer assisted supervision and support in providers' use of Triple P-Positive Parenting Program* (Publication No. 27732069) [Master's thesis, Graduate Faculty of North Carolina State University]. ProQuest Dissertations and Theses Global.
- Parker, A., Johnson-Motoyama, M., Mariscal, E. S., Guilamo-Ramos, V., Reynoso, E., & Fernandez, C. (2020). Novel service delivery approach to address reproductive health disparities within immigrant Latino communities in geographic hot spots: An implementation study. *Health & Social Work, 45*(3), 155–163. <https://doi.org/10.1093/hsw/hlaa014>
- Parra Cardona, J. R., Domenech-Rodriguez, M., Forgatch, M., Sullivan, C., Bybee, D., Holtrop, K., Escobar-Chew, A. R., Tams, L., Dates, B., & Bernal, G. (2012). Culturally adapting an evidence-based parenting intervention for Latino immigrants: The need to integrate fidelity and cultural relevance. *Family Process, 51*(1), 56–72. <https://doi.org/10.1111/j.1545-5300.2012.01386.x>

- Patras, J., & Klest, S. (2016). Group size and therapists' workplace ratings: Three is the magic number. *Journal of Social Work, 16*(2), 216–227. <https://doi.org/10.1177/1468017315581564>
- Patrick, M. E., Rhoades, B. L., Small, M., & Coatsworth, J. D. (2008). Faith-placed parenting intervention. *Journal of Community Psychology, 36*(1), 74–80. <https://doi.org/10.1002/jcop.20218>
- Pickard, K. E., Wainer, A. L., Bailey, K. M., & Ingersoll, B. R. (2016). A mixed-method evaluation of the feasibility and acceptability of a telehealth-based parent-mediated intervention for children with autism spectrum disorder. *Autism, 20*(7), 845–855. <https://doi.org/10.1177/1362361315614496>
- Polaha, J., Schetzina, K. E., Baker, K., & Morelen, D. (2018). Adoption and reach of behavioral health services for behavior problems in pediatric primary care. *Families, Systems, & Health, 36*(4), 507–512. <https://doi.org/10.1037/fsh0000380>
- Porta, C. M., Bloomquist, M. L., Garcia-Huidobro, D., Gutiérrez, R., Vega, L., Balch, R., Yu, R., & Cooper, D. K. (2018). Bi-national cross-validation of an evidence-based conduct problem prevention model. *Cultural Diversity and Ethnic Minority Psychology, 24*(2), 231–241. <https://doi.org/10.1037/cdp0000178>
- Poulsen, M. N., Vandenhoudt, H., Wyckoff, S. C., Obong'o, C. O., Ochura, J., Njika, G., Otwoma, N. J., & Miller, K. S. (2010). Cultural adaptation of a U.S. evidence-based parenting intervention for rural Western Kenya: From Parents Matter! to Families Matter! *AIDS Education and Prevention: Official Publication of the International Society for AIDS Education, 22*(4), 273–285. <https://doi.org/10.1521/aeap.2010.22.4.273>
- Puffer, E. S., Annan, J., Sim, A. L., Salhi, C., & Betancourt, T. S. (2017). The impact of a family skills training intervention among Burmese migrant families in Thailand: A randomized controlled trial. *PLOS ONE, 12*(3), e0172611. <https://doi.org/10.1371/journal.pone.0172611>
- Quetsch, L. B. (2019). *A randomized controlled trial of Parent-Child Interaction Therapy with and without incentives in a community mental health setting* [Doctoral dissertation, Eberly College of Arts and Sciences at West Virginia University]. <https://doi.org/10.33915/etd.6463>
- Ramos, G. G. (2019). *Helping mothers help their children cope with stress: Evaluation of a program for Latina mothers* [Doctoral dissertation, Washington State University]. <https://hdl.handle.net/2376/17901>

- Romney, S., Israel, N., & Zlatevski, D. (2014). Exploration-stage implementation variation: Its effect on the cost-effectiveness of an evidence-based parenting program. *Zeitschrift Für Psychologie*, 222(1), 37–48. <https://doi.org/10.1027/2151-2604/a000164>
- Roosa Ordway, M., McMahon, T. J., De Las Heras Kuhn, L., & Suchman, N. E. (2018). Implementation of an evidenced-based parenting program in a community mental health setting. *Infant Mental Health Journal*, 39(1), 92–105. <https://doi.org/10.1002/imhj.21691>
- Rudo-Stern, J. (2019). *Comparison of video and audio rating modalities for assessment of provider fidelity to a family-centered, evidence-based program* [Doctoral dissertation, Arizona State University]. <https://keep.lib.asu.edu/items/158498>
- Saldana, L., Chapman, J. E., Campbell, M., Alley, Z., Schaper, H., & Padgett, C. (2021). Meeting the needs of families involved in the child welfare system for parental substance abuse: Outcomes from an effectiveness trial of the Families Actively Improving Relationships program. *Frontiers in Psychology*, 12, 689483. <https://doi.org/10.3389/fpsyg.2021.689483>
- Scudder, A. T., & Herschell, A. D. (2015). Building an evidence-base for the training of evidence-based treatments in community settings: Use of an expert-informed approach. *Children and Youth Services Review*, 55, 84–92. <https://doi.org/10.1016/j.childyouth.2015.05.003>
- Scudder, A. T., Taber-Thomas, S. M., Schaffner, K., Pemberton, J. R., Hunter, L., & Herschell, A. D. (2017). A mixed-methods study of system-level sustainability of evidence-based practices in 12 large-scale implementation initiatives. *Health Research Policy and Systems*, 15(1), 102. <https://doi.org/10.1186/s12961-017-0230-8>
- Self-Brown, S., Frederick, K., Binder, S., Whitaker, D., Lutzker, J., Edwards, A., & Blankenship, J. (2011). Examining the need for cultural adaptations to an evidence-based parent training program targeting the prevention of child maltreatment. *Children and Youth Services Review*, 33(7), 1166–1172. <https://doi.org/10.1016/j.childyouth.2011.02.010>
- Shapiro, C. J., & Charest, E. (2020). Factors associated with provider self-efficacy in delivery of evidence-based programs for children, youth, and families. *Child & Family Social Work*, 25(3), 637–647. <https://doi.org/10.1111/cfs.12738>
- Shapiro, C. J., Prinz, R. J., & Sanders, M. R. (2015). Sustaining use of an evidence-based parenting intervention: Practitioner perspectives. *Journal of Child and Family Studies*, 24(6), 1615–1624. <https://doi.org/10.1007/s10826-014-9965-9>

- Sigmarsdóttir, M., & Guðmundsdóttir, E. V. (2013). Implementation of Parent Management Training-Oregon Model (PMTO™) in Iceland: Building sustained fidelity. *Family Process, 52*(2), 216–227. <https://doi.org/10.1111/j.1545-5300.2012.01421.R>
- Sim, A. L., Bowes, L., Maignant, S., Magber, S., & Gardner, F. (2021). Acceptability and preliminary outcomes of a parenting intervention for Syrian refugees. *Research on Social Work Practice, 31*(1), 14–25. <https://doi.org/10.1177/1049731520953627>
- Skale, G., Perez, H., & Williams, M. E. (2020). Factors influencing implementation of evidence-based mental health interventions for infants and young children. *The Journal of Behavioral Health Services & Research, 47*(4), 493–508. <https://doi.org/10.1007/s11414-020-09694-5>
- Smith, J. D., Stormshak, E. A., & Kavanagh, K. (2015). Results of a pragmatic effectiveness–implementation hybrid trial of the Family Check-Up in community mental health agencies. *Administration and Policy in Mental Health and Mental Health Services Research, 42*(3), 265–278. <https://doi.org/10.1007/s10488-014-0566-0>
- Stern, S. B., Alaggia, R., Watson, K., & Morton, T. R. (2008). Implementing an evidence-based parenting program with adherence in the real world of community practice. *Research on Social Work Practice, 18*(6), 543–554. <https://doi.org/10.1177/1049731507308999>
- Stokes, J. (2014). *Effectiveness of community-delivered Parent-Child Interaction Therapy compared to treatment as usual* [Doctoral dissertation, West Virginia University]. <https://researchrepository.wvu.edu/etd/197>
- Suchman, N., Berg, A., Abrahams, L., Abrahams, T., Adams, A., Cowley, B., Decoste, C., Hawa, W., Lachman, A., Mpinda, B., Cader-Mokoa, N., Nama, N., & Voges, J. (2020). Mothering from the Inside Out: Adapting an evidence-based intervention for high-risk mothers in the Western Cape of South Africa. *Development and Psychopathology, 32*(1), 105–122. <https://doi.org/10.1017/S0954579418001451>
- Taylor, W. D., Asgary-Eden, V., Lee, C. M., & LaRoche, K. J. (2015). Service providers' adherence to an evidence-based parenting program: What are they missing and why? *Journal of Child and Family Studies, 24*(1), 50–56. <https://doi.org/10.1007/s10826-013-9812-4>
- Thomson, S., Michelson, D., & Day, C. (2014). From parent to 'peer facilitator': A qualitative study of a peer-led parenting programme. *Child: Care, Health and Development, 41*(1), 76–83. <https://doi.org/10.1111/cch.12132>

- Turner, K. M. T., & Sanders, M. R. (2006). Help when it's needed first: A controlled evaluation of brief, preventive behavioral family intervention in a primary care setting. *Behavior Therapy, 37*(2), 131–142. <https://doi.org/10.1016/j.beth.2005.05.004>
- Weaver, N. L., Nansel, T. R., Williams, J., Tse, J., Botello-Harbaum, M., & Willson, K. (2011). Reach of a kiosk-based pediatric injury prevention program. *Translational Behavioral Medicine, 1*(4), 515–522. <https://doi.org/10.1007/s13142-011-0066-7>
- Webster-Stratton, C. H., Reid, M. J., & Marsenich, L. (2014). Improving therapist fidelity during implementation of evidence-based practices: Incredible Years program. *Psychiatric Services, 65*(6), 789–795. <https://doi.org/10.1176/appi.ps.201200177>
- West, A. L., Berlin, L. J., Goodman, A., Endy, K., Manzon, C., & Harden, B. J. (2022). Home-based Early Head Start plus Attachment and Biobehavioral Catch-up: A qualitative study of implementation outcomes. *Journal of Child and Family Studies, 31*(4), 1057–1068. <https://doi.org/10.1007/s10826-021-02189-7>
- Whitaker, D. J., Rogers-Brown, J. S., Cowart-Osborne, M., Self-Brown, S., & Lutzker, J. R. (2015). Public child welfare staff knowledge, attitudes, and referral behaviors for an evidence-based parenting program. *Psychosocial Intervention, 24*(2), 89–95. <https://doi.org/10.1016/j.psi.2015.06.001>
- Whitaker, D. J., Ryan, K. A., Wild, R. C., Self-Brown, S., Lutzker, J. R., Shanley, J. R., Edwards, A. M., McFry, E. A., Moseley, C. N., & Hodges, A. E. (2012). Initial implementation indicators from a statewide rollout of SafeCare within a child welfare system. *Child Maltreatment, 17*(1), 96–101. <https://doi.org/10.1177/1077559511430722>
- Woodfield, M. J., Cargo, T., Merry, S. N., & Hetrick, S. E. (2021). Barriers to clinician implementation of Parent-Child Interaction Therapy (PCIT) in New Zealand and Australia: What role for time-out? *International Journal of Environmental Research and Public Health, 18*(24), 13116. <https://doi.org/10.3390/ijerph182413116>
- Yingling, M. E., Hock, R. M., Feinberg, M. E., & Holbert, A. A. (2020). Community-engaged process to adapt evidence-based programs for parents of children with autism spectrum disorder. *Children and Youth Services Review, 112*, 104876. <https://doi.org/10.1016/j.childyouth.2020.104876>
- Zerón, G. A. L. (2017). *Exploring the relevance of a culturally adapted parenting intervention for low-income ethnic minority families involved in the child welfare system: A qualitative study with*

*parents and interventionists* (Publication No. 10686853) [Doctoral dissertation, Michigan State University]. ProQuest Dissertations and Theses Global.
